# Supplementary material
Source: publisher figshare collection journal article supplement (https://future-science-group.figshare.com/ndownloader/files/28250229)
Supplement: Supplementary file 1 [file 28250229]

Table 3: Main assignees of the 26 co-assigned patents between EU and CN sorted by country and entity (online only)

| **#** | **Country** | **# of  Patents** |
| --- | --- | --- |
| 1 | **France** | 19 |
| 2 | **United Kingdom** | 6 |
| 3 | **Swisse** | 6 |
| 4 | **Canada** | 5 |
| 5 | **Israel** | 4 |
| 6 | **Germany** | 3 |

| **#** | **Assignee (Companies and research insitututes)** | **# of  Patents** | **Country** |
| --- | --- | --- | --- |
| 1 | **Biomérieux** | 7 | France |
| 2 | **IBM (CHINA)** | 7 | China |
| 3 | **IBM (UK)** | 6 | UK |
| 4 | **PATHWAY PHARMACEUTICALS** | 4 | China |
| 5 | **Roche** | 4 | Swisse |
| 6 | **INSERM** | 4 | France |
| 7 | **BASF (DE)** | 2 | Germany |
| 8 | **BASF (CN)** | 2 | China |
| 9 | **CNRS** | 2 | France |
| 10 | **INSTITUT PASTEUR** | 2 | France |
| 11 | **HOSPICES CIVILS DE LYON** | 2 | France |
| 12 | **UNIVERSITE CLAUDE BERNARD LYON 1** | 2 | France |
| 13 | **IBM (DE)** | 1 | Germany |
| 14 | **Arius research** | 1 | Canada |
